# Supplementary material
Source: Springer Nature journal article supplement (https://www.springermedizin.de/resource/supplementary/12978_2013_240_MOESM4_ESM.pdf/9602306)
Supplement: MOESM4 [file 9602306]

Eligibility criteria:

Women aged >16, not pregnant, suffering from unexplained CPP with negative urine dipstick

Eligible patients

Index test

Index Test:

1. Bladder filling pain
2. Bladder wall tenderness

Positive

Negative

Reference test:

Symptom-based diagnosis by expert consensus panel eg. PUF questionnaire

Reference tests

Reference tests

BPS present (TP)

BPS absent (FP)

BPS present (FN)

BPS absent (TN)
